# Supplementary material for: Gut Microbiota-driven Drug Metabolism in Inflammatory Bowel Disease
Source: PubMed Central journal article supplement — J Crohns Colitis. 2020 Jul 11;15(2):307–15. doi: 10.1093/ecco-jcc/jjaa143 (PMC7904070; doi:10.1093/ecco-jcc/jjaa143), 2020-07-11
Supplement: jjaa143_suppl_supplementary_data_1.pdf [file jjaa143_suppl_supplementary_data_1.pdf]

### *Population:*

"Inflammatory Bowel Diseases"[Mesh] OR inflammatory bowel dis\*[tiab] OR ulcerative colitis[tiab] OR colitis ulcerosa[tiab] OR crohn\*[tiab] OR regional enteritis[tiab] OR ileocolitis[tiab] OR terminal ileiti\*[tiab] OR regional ileiti\*[tiab] OR ibd[tiab]

"Tumor Necrosis Factors/antagonists and inhibitors"[Mesh] OR anti tumour necrosis factor\*[tiab] OR anti tnf[tiab] OR anti tumor necrosis factor\*[tiab] OR adalimumab[tiab] OR humira[tiab] OR enbrel[tiab] OR infliximab[tiab] OR remicade[tiab] OR remsima[tiab] OR flixabi[tiab] OR inflectra[tiab] OR amgevita[tiab] OR hulo[tiab] OR hyrimoz[tiab] OR imraldi[tiab] OR golimumab[tiab] OR simponi[tiab] OR ustekinumab[tiab] OR stelara[tiab] OR vedolizumab[tiab] OR entyvio[tiab] OR tofacitinib[tiab] OR xeljanz[tiab] OR

"Prednisone"[Mesh] OR "corticosteroids"[Mesh] OR "prednisolone"[Mesh] OR "glucocorticoids"[Mesh] OR prednison[tiab] OR prednisone[tiab] OR prednisolone[tiab] OR glucocorticoids[tiab] OR glucocorticoid[tiab] OR corticosteroid[tiab] OR corticosteroids[tiab] OR methylprednisolone[tiab] OR thiopurine[tiab] OR "Azathioprine"[Mesh] OR azathioprine[tiab] OR azathiopurine[tiab] OR azothioprine[tiab] OR AZA[tiab] OR imuran[tiab] OR immuran[tiab] OR "Mercaptopurine"[Mesh] OR mercaptopurine[tiab] OR MP[tiab] OR 6-MP[tiab] OR 6MP[tiab] OR 6-mercaptopurine[tiab] OR 6 mercaptopurine[tiab] OR puri-nethol[tiab] OR purinethol[tiab] OR "Thioguanine"[Mesh] OR thioguanine[tiab] OR tioguanine[tiab] OR lanvis[tiab] OR 6-thioguanine[tiab] OR 6 thioguanine[tiab] OR 6-TG[tiab] OR 6TG[tiab] OR "Mesalamine"[Mesh] OR 5-aminosalicylate[tiab] OR 5-ASA[tiab] OR 5ASA[tiab] OR aminosalicylate[tiab] OR aminosalicylic acid[tiab] OR 5-aminosalicylate[tiab] OR 5-aminosalicylic acid[tiab] OR "Sulfasalazine"[Mesh] OR sulfasalazine[tiab] OR sulphasalazine[tiab] OR salazopyrine[tiab] OR azulfidine[tiab] OR mesalamine[tiab] OR mesalazine[tiab] OR mezavant[tiab] OR balsalazide[tiab] OR olsalazine[tiab] OR dipentum[tiab] OR pentasa[tiab] OR salofalk[tiab] OR "Methotrexate"[Mesh] OR methotrexate[tiab] OR methotrexate[tiab] OR MTX[tiab] OR "Budesonide"[Mesh] OR budesonide[tiab] OR entocort[tiab] OR budenofalk[tiab] OR cortiment[tiab] OR beclomethasone[tiab] OR betnesol[tiab] OR betamethasone[tiab] OR "Cyclosporine"[Mesh] OR cyclosporine[tiab] OR neoral[tiab] OR sandimmune[tiab] OR cyclosporin[tiab] OR ciclosporin[tiab] OR sandimmun[tiab]

### *Intervention*

"Gastrointestinal Microbiome"[Mesh] OR intestin\*[tiab] OR gut[tiab] AND microbiot\*[tiab] OR biota\*[tiab] OR flora\*[tiab] OR microflora\*[tiab] OR "Metagenome"[Mesh] OR "Microbiota"[Mesh] OR "Bacteria"[Mesh] OR metagenom\*[tiab] OR microbiom\*[tiab] OR microbiot\*[tiab] OR microorganism\*[tiab] OR micro organism\*[tiab] OR commensal\*[tiab] OR symbios\*[tiab] OR dysbios\*[tiab] OR pathosymbio\*[tiab] OR floras[tiab] OR colonisati\*[tiab] OR colonizati\*[tiab] OR microbial\*[tiab] OR enteropathogen\*[tiab] OR bacteria\*[tiab]

### *Outcomes*

"Pharmacokinetics"[Mesh] OR pharmacokinetics[tiab] OR Drug kinetics[tiab] OR "Biotransformation"[Mesh] OR biotransformation[tiab] OR "Activation, Metabolic"[Mesh] OR drug activation[tiab] OR metabolic activation[tiab] OR activation[tiab] OR "Inactivation, Metabolic"[Mesh] OR metabolic inactivation[tiab] OR metabolic drug inactivation[tiab] OR drug inactivation, metabolic[tiab] OR inactivation[tiab] OR metabolism[tiab] OR

"Prodrugs"[Mesh] OR prodrugs[tiab] OR prodrug[tiab] OR pro-drugs[tiab] OR pro-drug[tiab] OR pro drugs[tiab] OR drug precursors[tiab] OR precursors, drug[tiab] OR conversion[tiab] OR toxicity[tiab] OR adverse effects[tiab] OR adverse effect[tiab] OR adverse event[tiab] or adverse events[tiab] OR "Drug-Related Side Effects and Adverse Reactions"[Mesh] OR drug side effects[tiab] OR drug side effect[tiab] OR drug toxicity[tiab] OR drug toxicities[tiab] OR adverse drug event[tiab] OR adverse drug events[tiab] OR drug efficacy[tiab] OR efficacy[tiab] OR drug-microbiome interactions[tiab] OR drug-microbiome interaction[tiab] OR drug microbiome interaction[tiab] OR microbiome interaction[tiab] OR microbiota interaction[tiab] OR drug-microbiota interaction[tiab] OR drug microbiota interaction[tiab]

Search results 27-11-2019: 351

Embase session results (28 nov 2019): 658

('inflammatory bowel disease'/exp OR 'colitis'/exp) AND ('tumor necrosis factor inhibitor'/exp OR 'adalimumab'/exp OR 'etanercept'/exp OR 'infliximab'/exp OR 'golimumab'/exp OR 'ustekinumab'/exp OR 'vedolizumab'/exp OR 'tofacitinib'/exp OR 'prednisone'/exp OR 'glucocorticoid'/exp OR 'corticosteroid'/exp OR 'methylprednisolone'/exp OR 'mercaptapurine'/exp OR 'azathioprine'/exp OR 'tioguanine'/exp OR 'mesalazine'/exp OR 'aminosalicylic acid'/exp OR 'salazosulfapyridine'/exp OR 'agents used in inflammatory bowel disease'/exp OR 'olsalazine'/exp OR 'balsalazide'/exp OR 'methotrexate'/exp OR 'budesonide'/exp OR 'beclometasone'/exp OR 'betamethasone'/exp OR 'cyclosporine'/exp) AND ( 'intestine flora'/exp OR 'intestine'/exp OR 'microflora'/exp OR 'metagenome'/exp OR 'microorganism'/exp OR 'enteropathogen'/exp OR 'Faecalibacterium' OR 'Eubacterium rectale' OR 'Escherichia coli' OR 'Proteobacteria' OR 'Enterobacteriaceae' OR 'Firmicutes' OR 'Clostridiales' OR 'Bacteroidales' OR 'Bifidobacteriales' OR 'Lactobacillales' OR 'Akkermansia muciniphila' OR 'Fusobacteria' OR 'Roseburia' OR 'Ruminococcus' OR 'bacterium') AND ('pharmacokinetics':ti,ab,kw OR 'pharmacodynamics':ti,ab,kw' OR 'biotransformation':ti,ab,kw OR 'drug activation':ti,ab,kw OR 'metabolic activation':ti,ab,kw OR 'metabolism':ti,ab,kw OR 'prodrug':ti,ab,kw OR 'toxicity':ti,ab,kw OR 'side effect':ti,ab,kw OR 'adverse event':ti,ab,kw OR 'drug efficacy':ti,ab,kw OR 'adverse drug reaction':ti,ab,kw OR 'drug toxicity':ti,ab,kw OR 'microbial interaction':ti,ab,kw)
